# Supplementary material
Source: PubMed Central journal article supplement (PMC11298295)
Supplement: NIHMS2004509-supplement-Supplemental_Figure_1.pdf [file NIHMS2004509-supplement-Supplemental_Figure_1.pdf]

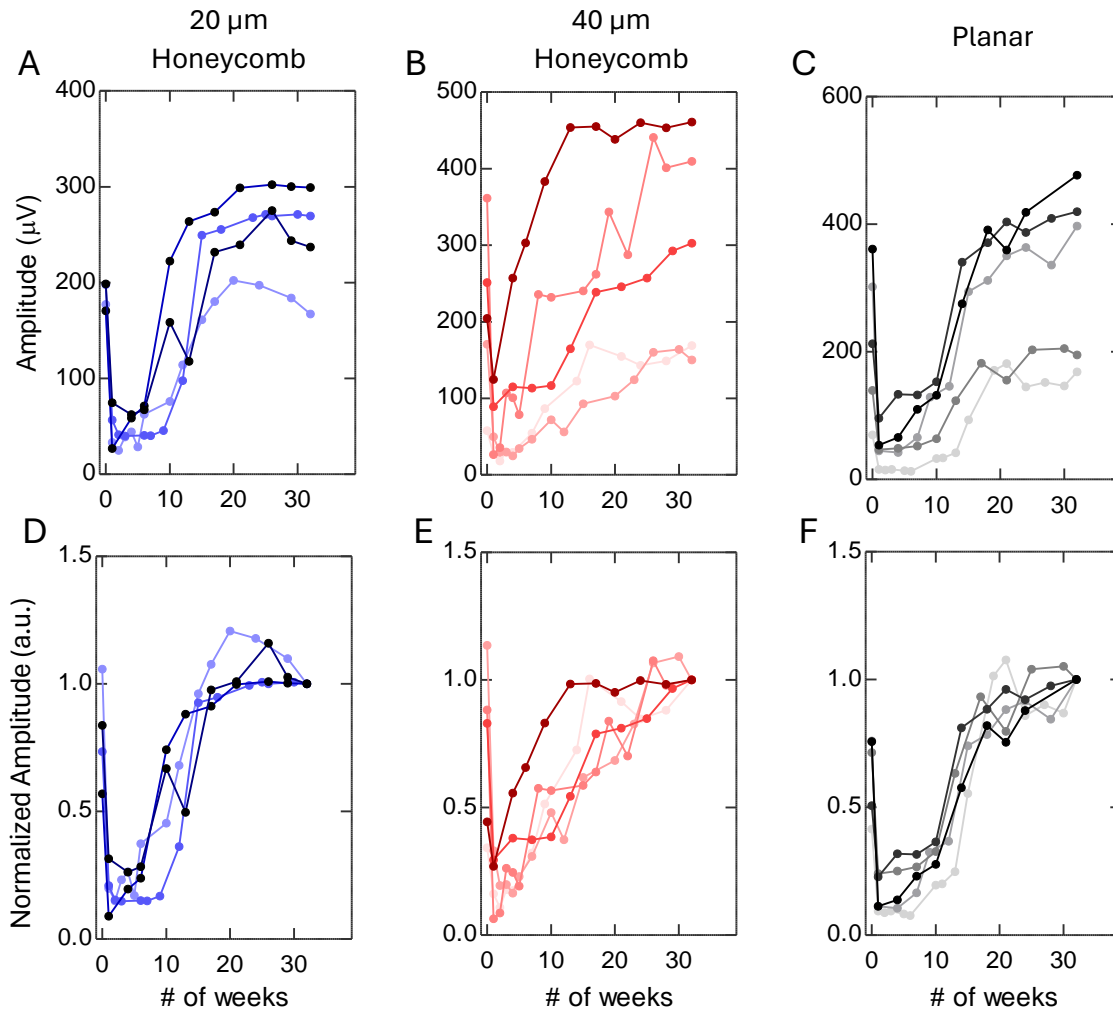

**Supplemental Figure 1.** (A-C) VEP amplitudes for individual animals at  $2.4 \text{ mW/mm}^2$  irradiance measured from the day of implantation for up to 32 weeks for 20-, 40-  $\mu\text{m}$  honeycomb and planar devices, respectively. The very different values in different animals at week 0 and week 32 highlight the variability between animals. (D-E) The same data normalized by the last measurement (week 32) shows much clearer the trend of decreasing amplitude after the day of implantation followed by a gradual recovery over 32 weeks. Normalizing the data helps minimize the biological (animal-to-animal) variability of the VEP amplitude and reveal the effect of the signal decline and recovery over time.
