# Supplementary material
Source: PubMed Central journal article supplement (PMC11298295)
Supplement: NIHMS2004509-supplement-Supplemental_Tables_1_and_2.pdf [file NIHMS2004509-supplement-Supplemental_Tables_1_and_2.pdf]

**Supplementary Table 1.** Primary and secondary antibodies used for immunohistochemistry

| <b>Primary antibodies</b>             |                                             |                                  |
|---------------------------------------|---------------------------------------------|----------------------------------|
| <b>Cell type</b>                      | <b>Host/Antibody</b>                        | <b>Supplier/Catalogue number</b> |
| Rod bipolar                           | Mouse/PKC $\alpha$                          | SCBT/sc-8393                     |
| Cone bipolar                          | Rabbit/Secretagoin                          | Cellsignaling/ 14037             |
| Amacrine subset                       | Sheep/Choline acetyltransferase (CHAT)      | Millipore/ AB1582                |
| Muller cell activation and astrocytes | Goat/Glial Fibrillary Acidic Protein (GFAP) | SCBT/SC-6170                     |
| Microglia                             | Rabbit/IBA 1                                | WAKO/ 019-19741                  |
| <b>Secondary antibodies</b>           |                                             |                                  |
| <b>Host/Reactivity</b>                | <b>Fluorophore</b>                          | <b>Supplier/Catalogue number</b> |
| Donkey/Rabbit                         | AF488                                       | Thermofisher/ A-21206            |
| Donkey/Mouse                          | CY3                                         | Jackson lab/ 715-165-150         |
| Donkey/Goat                           | AF594                                       | Thermofisher/ A-11058            |
| Donkey/Sheep                          | AF647                                       | Thermofisher/ A-21448            |

**Supplementary Table 2.** Absolute voxel values for the quantification of INL DAPI in non-implanted control animals, planar implants, 20 and 40  $\mu\text{m}$  honeycombs inside and outside the wells.

| Control   | Planar    | 40 $\mu\text{m}$   |                     | 20 $\mu\text{m}$   |                     |
|-----------|-----------|--------------------|---------------------|--------------------|---------------------|
|           |           | <i>Inside well</i> | <i>Outside well</i> | <i>Inside well</i> | <i>Outside well</i> |
| 384712078 | 404305663 | 240001792          | 127827319           | 125339879          | 163692852           |
| 309708493 | 245186308 | 152146235          | 60423724            | 92411087           | 123446776           |
| 347210285 | 396399634 | 219944258          | 79708684            | 114239867          | 86036599            |
|           | 261904841 | 155093883          | 98668824            | 87520829           | 234021590           |
|           | 326949111 | 191796542          | 91657137            | 104877915          | 151799454           |
